# Supplementary material for: Human serum albumin corona on functionalized gold nanorods modulates doxorubicin loading and release
Source: Royal Society of Chemistry journal article supplement (doi:10.1039/c8nj03673j), 2018-01-01
Supplement: c8nj03673j1.pdf [file c8nj03673j1.pdf]

**Human serum albumin corona on functionalized gold nanorods  
modulates doxorubicin loading and release**

Debolina Chakraborty<sup>2</sup>, Shivanshi Tripathi<sup>1</sup>, K.R. Ethiraj<sup>2</sup>, N. Chandrasekaran<sup>1</sup>, Amitava Mukherjee<sup>1\*</sup>

<sup>1</sup> Centre for Nanobiotechnology, Vellore Institute of Technology, Vellore, India.

<sup>2</sup> School of Advanced sciences, Vellore Institute of Technology, Vellore, India.

**Supplementary information**

**Corresponding author**

\*Dr. Amitava Mukherjee  
Senior Professor & Deputy Director  
Centre for Nanobiotechnology  
VIT University, Vellore – 632014  
Email: [amit.mookerjee@gmail.com](mailto:amit.mookerjee@gmail.com), [amitav@vit.ac.in](mailto:amitav@vit.ac.in)  
Phone: 91 416 2202620  
Fax: 91-416-224309

## 24 Estimation of hard and soft corona on functionalized AuNRs

25 Following addition of HSA to the functionalized AuNRs, the samples were incubated for a  
 26 time period of 1h. A series of 4 centrifugation was done and at each time, the supernatant was  
 27 collected and protein was quantified by Bradford assay. After the incubation period, the  
 28 samples were collected and centrifuged at 9000 rpm for 10 min to remove the unbound  
 29 protein from the particles. Another 2 rounds of centrifugation was done to separate the soft  
 30 corona. The pellet now was collected and treated with lamelli buffer and incubated for 5 min  
 31 at 90 °C, this mixture was further centrifuged to and the supernatant was quantified for hard  
 32 corona.

33 Table S1. Amount of soft and hard corona of HSA on CTAB-AuNRs, PSS-AuNRs and PEG-  
 34 AuNRs

| Functionalized AuNRs | HSA concentration (mg/mL) |                  |                 |                 | HSA bound / unit AuNR mass (mg/ $\mu$ g AuNR) |
|----------------------|---------------------------|------------------|-----------------|-----------------|-----------------------------------------------|
|                      | Initial                   | Unbound          | Soft            | Hard            |                                               |
| CTAB-AuNRs           | $39.12 \pm 0.66$          | $31.22 \pm 0.72$ | $6.33 \pm 0.21$ | $1.01 \pm 0.12$ | $1.46 \pm 0.2$                                |
| PSS-AuNRs            | $39.33 \pm 1.71$          | $34.13 \pm 0.21$ | $3.44 \pm 1.22$ | $0.53 \pm 1.17$ | $0.79 \pm 0.3$                                |
| PEG-AuNRs            | $39.17 \pm 0.76$          | $37.33 \pm 0.98$ | $2.06 \pm 0.5$  | $0.31 \pm 0.98$ | $0.47 \pm 0.2$                                |

35

36

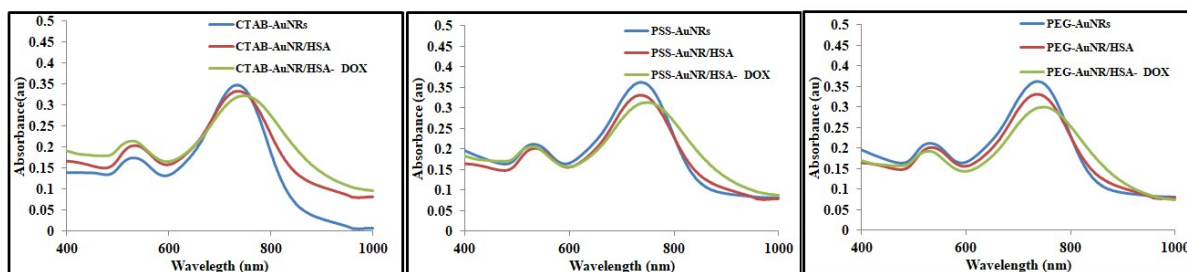

37

38 Fig S1. UV-visible spectra of functionalized (CTAB-, PSS- and PEG-) AuNRs
